## The causal role of male pubertal timing for the development of externalizing and internalizing traits: results from Mendelian randomization studies

Lars Dinkelbach<sup>1,2</sup>, Triinu Peters,<sup>2,3,4</sup> Corinna Grasemann<sup>5</sup>, Anke Hinney<sup>2,3,4</sup>, and Raphael Hirtz<sup>6</sup>

- (1) Department of Pediatrics III, University Hospital Essen, University of Duisburg-Essen, Essen, Germany
- (2) Institute of Sex- and Gender-sensitive Medicine, University Hospital Essen, University of Duisburg-Essen, Essen, Germany
- (3) Section of Molecular Genetics in Mental Disorders, University Hospital Essen, University of Duisburg-Essen, Essen, Germany
- (4) Center for Translational Neuro- and Behavioral Sciences, University Hospital Essen, University of Duisburg-Essen, Essen, Germany
- (5) Department of Pediatrics, Division of Rare Diseases and CeSER, St. Josef-Hospital, Ruhr-University Bochum, Bochum, Germany
- (6) Center for Child and Adolescent Medicine, Helios University Hospital Wuppertal, Witten/Herdecke University, Wuppertal, Germany

**Corresponding Author:** Lars Dinkelbach, MD, BSc, Department of Pediatrics III, University Hospital Essen, University of Duisburg-Essen, Hufelandstr. 55, Essen, Germany, [lars.dinkelbach@uk-essen.de](mailto:lars.dinkelbach@uk-essen.de)

**Abbreviations:** BMI=body mass index; FDR=false discovery rate; GWAS=genome-wide association study, IVW=inverse-variance weighted; MDD=major depressive disorder; MPT=male puberty timing; MR=Mendelian randomization; MVMR=multivariable Mendelian randomization; SNP=single-nucleotide polymorphism

|                    |                       |      |                  |   |
|--------------------|-----------------------|------|------------------|---|
| <b>Word count:</b> | Word count main text: | 4741 | Number of tables | 1 |
|                    | Number of figures:    | 3    |                  |   |
|                    | Word count abstract:  | 246  |                  |   |

**Keywords:** Male puberty timing, adolescence, mental health, depression

## Male puberty timing and psychological traits

### Abstract

Preexisting epidemiological studies suggest that early pubertal development in males is associated with externalizing (e.g., conduct problems, risky behavior, and aggression) and internalizing (e.g., depression and anxiety) traits and disorders. However, due to problems inherent to observational studies, especially of reverse causation and residual confounding, it remains unclear whether these associations are causal. Mendelian randomization (MR) studies take advantage of the random allocation of genes at conception and can establish causal relationships. In the current study,  $N=76$  independent genetic variants for male puberty timing (MPT) were derived from a large genome-wide association study (GWAS) on 205,354 participants and used as an instrumental variable in MR studies on 17 externalizing and internalizing traits and psychopathologies utilizing outcome GWAS with 16,400 to 1,045,957 participants. In these MR studies, earlier MPT was significantly associated with higher scores for the overarching phenotype of ‘Externalizing Traits’ (beta=-0.03, 95%-CI [-0.06, -0.01]). However, this effect was likely driven by an earlier age at first sex (beta=-0.17, 95%-CI [-0.21, -0.13]), without evidence for an effect on further externalizing phenotypes. Regarding internalizing phenotypes, earlier MPT was associated with higher levels of the ‘Depressed Affect’ subdomain of neuroticism (beta=-0.04, 95%-CI [-0.07, -0.01]). Late MPT was related to higher scores of internalizing traits in early life (beta=0.04, 95%-CI [0.01, 0.08]). In conclusion, this MR study supports a causal effect of MPT on specific traits and behaviors. However, no evidence for an effect of MPT on long-term clinical outcomes (depression, anxiety disorders, alcohol dependency, cannabis abuse) was found.

## Male puberty timing and psychological traits

### Background

Mental health disorders and substance abuse have an enormous impact on overall disease burden, ranking among the top five contributors to disability-adjusted life years among all disease entities [1]. Interestingly, the disease burden attributable to mental disorders peaks during adolescence and young adulthood, with the highest burden in males aged 15- to 19-years [1].

Consistent with this observation, early pubertal timing has been suggested as a risk factor for externalizing (e.g., oppositional defiant disorder, antisocial behavior, risky sexual behavior, and substance abuse) and internalizing traits and disorders (e.g., depression or anxiety) in several cross-sectional epidemiological and clinical studies with small but consistent effects in both males and females [2]. However, these associations are subject to numerous confounders, including the social microenvironment (i.e., embedding in familial, peer, and school systems [3, 4], the macroenvironment (i.e., the neighborhood income) [3, 5], ethnicity [6], and family interaction patterns [7, 8] – most of which are difficult to control or correct for in observational studies.

Mendelian randomization (MR) studies can overcome limitations inherent to observational studies, such as reverse causation or residual confounding [9, 10]. In brief, MR studies take advantage of the random allocation of genetic variants at conception. If a genetic variant is associated with an exposure (e.g., puberty timing), this genetic variant can serve as an unconfounded predictor to analyze the effect of the exposure on the outcome of interest (e.g., psychopathologies) under certain assumptions [9, 10].

Several MR studies analyzed the effects of pubertal timing on psychopathologies in females and discovered an influence of early age at menarche on depression [11] and substance abuse [12]. In

## Male puberty timing and psychological traits

males, one MR study analyzed the effect of pubertal timing on substance addiction and found no effect on tobacco, alcohol, or cannabis addiction [12]. However, conclusions from this MR analysis are limited since both the exposure and outcome associations were drawn from a single sample, the UK Biobank, violating the non-sample overlap assumption of two-sample MR studies [13]. In addition, this study relied on a Genome-Wide Association Study (GWAS) assessing pubertal timing by single measures of physical maturation (such as late vs. early voice break and late vs. early facial hair growth) rather than a combined measure of male pubertal timing [12].

In males, a recent meta-analysis of GWAS based on 205,354 European males combined different indicators of pubertal timing in boys (e.g., the timing of voice break and facial hair growth) to study the genetic associations of male puberty timing (MPT) in general [14]. Thus, this large-scale GWAS is less dependent on a specific assessment of MPT and provides a more reliable tool to investigate the causal effect of male pubertal timing on psychopathologies. In a previous MR study, this GWAS was utilized to analyze the effect of MPT on depression but did not find robust evidence for a relationship between both [15]. However, further psychopathologies in males have not been addressed by MR studies so far, despite reasonable evidence for extensive associations of MPT with externalizing and internalizing traits and disorders in epidemiological studies [2].

### **Objective**

Here, we aim to utilize multiple MR studies based on a current large GWAS to analyze whether male pubertal timing has a causal effect on the development of 1.) externalizing traits, extraversion, antisocial behavior, and aggression, 2.) risky behavior, including general risk

## Male puberty timing and psychological traits

tolerance, smoking, and risky sexual behavior (number of sexual partners, age at first sex) 3.) substance abuse, i.e., alcohol and cannabis abuse, 4.) internalizing traits and neuroticism, and 5.) internalizing psychiatric entities such as depression and anxiety disorders.

## Methods

### Study design and assumptions

To address the above-mentioned research questions, 17 two-sample MR studies were conducted. In MR studies, genetic variants, usually single nucleotide polymorphisms (SNPs), are used as instrumental variables to analyze the effect of the genetically predicted exposure variable (here, MPT) on the outcome variable (here, externalizing and internalizing traits and psychopathologies). SNPs are valid instrumental variables if the three main assumptions of MR studies are met: (a.) the relevance criterion, meaning that the genetic variant has to be strongly related to the exposure, (b.) the exchangeability criterion, meaning that the genetic variants are not related to the outcome via other pathways than the exposure of interest, and (c.) the exclusion restriction criterion, meaning that the genetic variants are not directly related to the outcome [9]. In two-sample MR studies, the genotype-exposure associations and genotype-outcome associations are derived from two distinct GWAS analyses. Consequently, the two-sample MR approach relies on two additional assumptions: (e.) non-overlapping exposure and outcome GWAS as sample overlap can result in a bias of unknown direction and extent [13] and (f.) the assumption that both the exposure and outcome GWAS are derived from the same population [16].

## Male puberty timing and psychological traits

Of the MR assumptions, only the relevance criterion (a.) can be tested directly [17]. This assumption was ensured by calculating F-statistics for each genetic variant. SNPs with F-statistics  $< 10$  are considered weak instruments [9]. For MPT, only genome wide significant ( $p < 5 \times 10^{-8}$ ) SNPs were utilized as instrumental variable [14], all surpassing the threshold for strong instruments (median F-statistic was 43.38, range 29.92 to 231.07). Violations of the second and third (b. and c.) assumptions arise when causal pathways between genetic variants and the outcome do not involve the exposure phenotype (i.e., the genetic variants are causally linked to the outcome either directly or via another phenotype), typically stemming from pleiotropy. Pleiotropy denotes a scenario where a genetic variant is linked to two or more seemingly unrelated phenotypes. To detect or correct for violations of the second and third (b. and c.) assumption, the following steps (detailed below) were taken: i.) identification and exclusion of pleiotropic outliers, ii.) calculating a set of so-called robust methods that are less susceptible to or correct for different kinds of pleiotropy [18], and iii.) correct for sources of pleiotropy by multivariable MR analyses [19]. Concerning step i.), the MR-PRESSO framework was used to identify horizontally pleiotropic outliers [20] and the identified pleiotropic SNPs were removed from further analysis. Concerning step ii.), the following set of robust methods were calculated after the exclusion of outliers: Weighted median- and mode-based estimates [21, 22], MR Egger [23] and MR-RAPS [24]. Details on these methods, how and to which extent they can correct for or are robust against pleiotropy, and their respective assumptions are given in Supplemental Methods 1. Concerning step iii.), increased body weight has consistently been associated with earlier puberty in boys [25, 26]. In addition, body weight is associated with internalizing and externalizing problems [27], suggesting it may serve as a pleiotropic pathway, which is supported by a previous MR study [15]. To analyze whether our results were affected by body weight-related pleiotropy, effect estimates of MPT on psychological outcomes were calculated, adjusting

## Male puberty timing and psychological traits

for BMI (IVW BMI<sub>corr</sub>). This adjustment was made through multivariable MR analyses (MVMR). For MVMR, a GWAS on BMI in 374,756 males was used [28].

Despite efforts to identify outcome GWAS without sample overlap, the current study included several GWAS for relevant outcomes that used data from the UK Biobank, also contributing to the exposure GWAS addressing male puberty timing. Thus, to assess the impact of a violation of the ‘non-overlap assumption’ (e.), beta weights and standard errors for voice break (VB) were derived from 23andMe participants (N = 55,871; [14]) and used as an alternative instrumental variable, after exclusion of weak instruments (SNPs with  $F < 10$  for the phenotype VB), to calculate an effect estimate without sample overlap (IVW VB).

The primary endpoint for all MR analyses was the effect estimate, as calculated by the inverse variance weighted (IVW) method after excluding pleiotropic outliers as identified by the MR-PRESSO framework. To analyze whether the exclusion of outliers by MR-PRESSO biased the results, the raw IVW-effect estimate without outlier exclusion was calculated (MR-PRESSO raw) as a sensitivity analysis. To correct for multiple comparisons, the p-values of primary endpoints were corrected by the false discovery rate (FDR) [29]. Scatter plots (visualizing the effect of each SNP on male puberty timing and the outcome of interest), funnel plots (drawing the MR estimate of each SNP against the inverse of its standard error as a measure of its precision), and forest plots (illustrating the MR estimate for each SNP individually) were drawn to visually screen for violations of MR assumptions or distortion of effects by single genetic variants [18]. Leave-one-out analyses were conducted to assess whether the results were driven by single variants. The CheckSumStats package was used to confirm the correct annotation of the effect allele and the European population of the summary statistics utilized for the current MR analyses [30]. Details

## Male puberty timing and psychological traits

on the software packages used can be found in the Supplemental Methods. Figure 1 gives an overview of the study design.

### **Study population**

Table 1 gives an overview of the GWAS and sample sizes utilized in the current study. The selection of outcome GWAS was motivated by i.) the sample size and novelty of the sample, ii.) the availability of summary statistics, and iii.) the potential sample overlap between exposure and outcome GWAS. However, the latter criterion was not always met due to the excessive use of consortia data to achieve large sample sizes. All participants of the GWAS utilized in the current study were of white European ancestry, thus presumably fulfilling the ‘same population assumption’ (f.). The focus on this population was driven by the higher availability of data rather than scientific interest. Only the outcome ‘Age at First Sex’ was based on a male-specific GWAS [31]. Due to the lack of large sex-specific GWAS, all other outcome GWAS were based on sex-combined GWAS. However, all sex-combined GWAS included sex as covariates (in some GWAS, no details on included covariates were provided). The phenotypes ‘Early Life Internalizing Traits’ and ‘Early Life Aggression’ were based on cross-sectional and longitudinal assessments in children and adolescents, leading to 251,152 observations of 64,561 subjects (for internalizing traits) and to 328,935 observations of 87,485 subjects (for aggression) included in the GWAS [32, 33]. About half of the observations in these two GWAS were examined in adolescents or late childhood (11-18 years) [32]. The remaining GWAS were mainly conducted in adults [31-44]. Supplemental Methods 2 and Supplemental Table S1 give a detailed description of how the respective phenotypes were obtained, the SNP-based heritability of each outcome GWAS, and further sample characteristics.

### *Instrumental variable*



## Male puberty timing and psychological traits

For MPT, the GWAS by Hollis, et al. [14] based on 205,354 men of European ancestry was used. This GWAS comprised data from the UK Biobank and 23andMe in which MPT was operationalized as recalled age at voice break (in the 23andMe cohort) or, for UK Biobank participants, having a relatively (compared to peers) early/late (or about average) onset of voice break and onset of facial hair grow [14]. These five phenotypes (age at voice break, early/late voice break, early/late facial hair growth) were combined in a meta-analysis to perform a GWAS on the underlying trait ‘Male Puberty Timing’. In total, 76 independent (defined by distance of at least 1 MB) genome-wide significant ( $p < 5 \times 10^{-8}$ ) target SNPs for MPT were identified and utilized as instrumental variables for the current MR analyses. These SNPs explained 2.2% of the variance in MPT. The median F-statistic was 43.38 (range 29.92 to 231.07).

To evaluate if using UK Biobank data led to phenotype-exposure-related sample overlap that confounded our MR results, we conducted sensitivity analyses with ‘Age at Voice Break’ data from 23andMe Inc., which included 55,871 participants [14]. Of the 76 target SNPs for MPT, 36 had F-statistics  $> 10$  for ‘Age at Voice Break’ (VB) had and thus qualified as instrumental variable for VB. For VB, beta and standard errors of these 36 SNPs were derived from the subsample from 23andMe Inc. participants as reported by Hollis, et al. [14].

## Results

### **The effect of male puberty timing on externalizing traits and disorders**

For ‘Externalizing Traits’, 65 of the 76 target SNPs for MPT were available in the outcome GWAS by Williams, et al. [34] for ‘Externalizing Traits’. The MR-PRESSO global test for pleiotropy was significant ( $RSS_{obs} = 380.38$ ,  $p < 3 \times 10^{-4}$ ), and seven outliers were identified by MR-PRESSO (see Supplemental Table S02 for details). Thus, the instrumental variable used for

## Male puberty timing and psychological traits

further analyses consisted of 58 SNPs. The IVW estimate revealed a negative effect of genetically predicted male puberty timing on externalizing traits, i.e., earlier pubertal timing was related to higher scores for externalizing traits (IVW,  $\beta=-0.03$ , 95%-CI [-0.06, -0.01], see Figure 2). The Q-statistic indicated significant heterogeneity (based on IVW:  $df=57$ , Q-statistic=139.70,  $p=6.78 \times 10^{-9}$ ; based on MR Egger:  $df=56$ , Q-statistic=131.76,  $p=4.8 \times 10^{-9}$ ). Sensitivity analyses: The weighted median, MR-RAPS, the IVW estimate without exclusion of pleiotropic SNPs (MR-PRESSO raw), and the MR analysis without sample overlap (IVW VB) confirmed the significant results ( $\beta$  from -0.05 to -0.03, p-values from 0.002 to 0.007, see Figure 3A for details). The weighted-mode method and the MVMR considering BMI-related pleiotropy (IVW BMIcorr) led to similar effect estimates but with wider confidence intervals and were, thus, non-significant (Weighted Mode,  $\beta=-0.04$ , 95%-CI [-0.09, 0.01],  $p=0.099$ ; IVW BMIcorr,  $\beta=-0.02$ , 95%-CI [-0.05, 0.01],  $p=0.151$ ).

For 'Age at First Sex', all the 76 target SNPs for male puberty timing were covered in the outcome GWAS by Mills, et al. [31]. The MR-PRESSO global test for pleiotropy was significant ( $RSS_{obs}=241.57$ ,  $p<3 \times 10^{-4}$ ), and MR-PRESSO identified five outliers. The MR analysis revealed a significant effect of MPT on the age at first sexual intercourse; earlier MPT was associated with an earlier age at first sexual intercourse (IVW,  $\beta=-0.17$ , 95%-CI [-0.21, -0.13], see Figure 2). The Q-statistic revealed significant heterogeneity (IVW:  $df=70$ , Q-statistic=138.83,  $p=1.9 \times 10^{-6}$ ; MR Egger:  $df=69$ , Q-statistic=183.80,  $p=1.3 \times 10^{-6}$ ). All sensitivity analyses, including those addressing heterogeneity, confirmed this effect ( $\beta$  from -0.20 to -0.09; see Figure 3B for details).

For the remaining externalizing outcomes ('Alcohol Dependency', 'Risk Tolerance', 'Extraversion', 'Cannabis Abuse', 'Number of Sexual Partners', 'Ever Smoker', 'Early Life

## Male puberty timing and psychological traits

Aggression’, and ‘Antisocial Behavior’), the IVW effect estimate remained non-significant (see Figure 2). For ‘Risk Tolerance’, ‘Number of Sexual Partners’, ‘Cannabis Abuse’ and ‘Ever Smoker’, single sensitivity analyses indicated significant effects, but these no longer appeared in the remaining or additionally performed sensitivity analyses (see Supplementary Figures S23, S25, S26, and S27 for details).

### **The effect of male puberty timing on internalizing traits and disorders**

71 of the 76 target SNPs for ‘Male Puberty Timing’ were available in the outcome GWAS by Jami, et al. [32] for ‘Early Life Internalizing Traits’. The MR-PRESSO global test for pleiotropy was not significant ( $RSS_{obs}=84.24$ ,  $p=0.169$ ), and MR-PRESSO identified no outlier. The MR analysis revealed a significant effect of genetically predicted male puberty timing: later maturation leads to more internalizing traits in children and adolescents (IVW,  $\beta=0.04$ , 95%-CI [0.01, 0.07], see Figure 2). The Q-statistic indicated no significant heterogeneity (IVW:  $df=70$ ,  $Q\text{-statistic}=81.88$ ,  $p=0.157$ ; MR Egger:  $df=69$ ,  $Q\text{-statistic}=78.51$ ,  $p=0.203$ ). The above finding was confirmed by all sensitivity analyses ( $\beta$  from 0.04 to 0.13), except for the weighted mode method ( $\beta=0.01$ , 95%-CI [-0.08, 0.10], see Figure 3C).

Concerning the “Depressed Affect” subdomain of neuroticism, 72 target SNPs were included in the outcome GWAS by Nagel, et al. [37]. The MR-PRESSO global test for pleiotropy was significant ( $RSS_{obs}=140.03$ ,  $p<3\times 10^{-4}$ ), and one outlier was identified, which was subsequently excluded from further analyses (see Supplemental Table S2 for details). The MR analysis revealed that earlier MPT is associated with an increased ‘Depressed Affect’ (IVW,  $\beta=-0.04$ , 95%-CI [-0.07, -0.01], see Figure 2). The Q-statistic was significant, indicating heterogeneity

## Male puberty timing and psychological traits

(IVW:  $df=70$ ,  $Q$ -statistic=123.84,  $p=7.6 \times 10^{-5}$ ; MR Egger:  $df=69$ ,  $Q$ -statistic=122.03,  $p=8.7 \times 10^{-5}$ ).

Sensitivity analyses: The weighted median method, the IVW effect estimate without exclusion of outliers (MR-PRESSO raw), and the analysis excluding sample overlap (IVW VB) led to significant negative effect estimates (beta from  $-0.04$  to  $-0.02$ ). The weighted mode method, MR-RAPS, and the MVMR (IVW BMIcorr) method provided similar, but less precise (meaning wider confidence intervals) effect estimates with non-significant hypotheses testing (beta from  $-0.03$  to  $-0.02$ , see Figure 3D for details). In contrast, the MR Egger method provided an effect estimate close to zero and wide confidence intervals (beta=0.00, 95%-CI [-0.08, -0.08]). However, the MR Egger method might have been biased by a possible violation of the NOME assumption ( $I^2=0.780$ , see Supplemental Methods 1 for details). The funnel plot illustrating the precision of each genetic variant and their MR effect estimate revealed one outlier with a strong negative effect estimate (see Supplementary Figure S14). However, even after excluding this outlier, leave-one-out analyses confirmed an effect of MPT on 'Depressed Affect' (see Supplementary Figure S16).

For the outcome 'Age at Onset of Depression', a significant effect of 'Male Puberty Timing' was observed (IVW, beta=-0.05, 95%-CI [-0.10, 0.0],  $p=0.034$  without FDR-correction), suggesting that earlier maturation in males is linked to a younger age at onset of depression. However, after FDR correction, this effect must be considered non-significant according to conventional criteria ( $p=0.115$ , see Figure 2). Sensitivity analyses, including MR Egger, MR-RAPS, MR-PRESSO raw, and IVW VB, supported an association between MPT and 'Age at Onset of Depression'. In contrast, the weighted median and weighted mode method yielded non-significant results with smaller (weighted median, beta=-0.02, 95%-CI [-0.09, 0.04],) and even positive (weighted mode, beta= 0.01, 95%-CI [-0.14, 0.17]) effect estimates, suggesting a potential bias of the IVW results by pleiotropy (see Supplementary Figure S21 for details). Leave-one-out analyses further

## Male puberty timing and psychological traits

underscored the instability of this finding, as the exclusion of individual SNPs rendered the association between MPT and ‘Age at Onset of Depression’ non-significant (see Supplementary Figure S20 for details).

For all other internalizing outcomes, MR analyses yielded non-significant results, see Figure 2). This pattern was confirmed across various sensitivity analyses (see Supplementary Figures S22-S33 for details).

## Discussion

Epidemiological studies indicate that an early onset of puberty is a risk factor for a broad spectrum of externalizing and internalizing behaviors and disorders. However, correlational relationships in epidemiological studies are subject to numerous confounders. Here, several MR studies were performed to provide evidence for a causal contribution of MPT to the development of character traits, behaviors, and psychopathologies.

### Externalizing Traits and Disorders

There was evidence that early pubertal timing in males leads to an earlier initiation of sexual activity, i.e., a younger age at first sexual intercourse. This observation is consistent with a genetic correlation between the age of voice break and the age at first sexual intercourse [31] as well as increased risky sexual behaviors in early maturing boys in epidemiological studies [2]. Our analyses also revealed an association between an early onset of puberty in boys and the development of externalizing traits. The outcome 'Externalizing Traits' was operationalized via a meta-analysis that combined seven problematic behaviors and psychiatric entities (including smoking, cannabis and problematic alcohol use, risk tolerance as well as the number of sexual contacts, and the age at first sexual contact; see Supplemental Methods 2 and [35]). However,

## Male puberty timing and psychological traits

except for the age at first sexual intercourse, MR analyses exploring the relationship between MPT and specific entities ('Alcohol Dependency', 'Cannabis Abuse', 'Ever Smoker', 'Risk Tolerance', 'Number of Sexual Partners') by individual GWAS found no significant effects of MPT on these outcomes (see Figure 2). Therefore, the statistical relationship between MPT and the combined outcome 'Externalizing Traits' seems primarily driven by the effect of MPT on age at first sexual contact, and it remains unclear whether MPT has further influence on externalizing traits beyond this effect.

### **Internalizing Traits and Disorders**

To our surprise, we observed that genetically predicted *later* male puberty leads to more internalizing traits in children and adolescents ('Early Life Internalizing Traits'; i.e., depressive symptoms, emotional problems, and anxiety). This observation contrasts with most previous epidemiological studies suggesting a link between *early* (but not late) onset of puberty and the development of internalizing problematic traits in adolescent boys [2]. Additionally, a meta-analysis of the effects of *late* puberty timing in males did not indicate an association with the occurrence of psychopathologies [2]. However, this conclusion rests on a limited number of studies, as noted by the authors of this meta-analysis [2]. Further, a recent large combined epidemiological and MR study including the most comprehensive set of confounders to date, found no evidence of a relationship between (either early or late) MPT and major depressive disorder (MDD) in males [15]. This finding suggests that previous studies may have been affected by confounding, which could also extend to other domains of internalizing traits. The 'gendered deviation' hypothesis postulates that those experiencing the most extreme deviations in puberty timing are at the highest risk for mental health problems [2, 45]. As girls generally mature earlier than boys, late maturing boys are particularly at risk of suffering psychosocial

## Male puberty timing and psychological traits

stress, as late maturing boys are not only the last of their sex, but also the last of their whole age group to go through puberty [2, 45]. So far, epidemiological studies suggested little evidence for this hypothesis [2]. In contrast, our observation of more internalizing symptoms with genetically predicted later maturation in boys would be consistent with this hypothesis. However, it must be noted that the outcome GWAS by Jami, et al. [32] relied on a heterogeneously defined phenotype of ‘Early Life Internalizing Traits’ that was assessed using multiple sources (e.g. parental, self or teacher ratings) and different measurement instruments, across a broad age range (boys and girls between 3 and 18 years). As individual-level data or age-/instrument-specific GWAS were not available to us, our analysis cannot disentangle whether the effect found here is age-specific (e.g., later MPT leading to more internalizing problems, early MPT leading to less internalizing problems, or both) or non-linear (e.g., extreme early or late puberty leading to more internalizing problems). Additionally, it remains unclear whether our finding is applicable to all measurement approaches included to define the outcome phenotype. Thus, the final interpretation of our results, and the extent to which confounding factors may account for discrepancies with existing epidemiological studies, must be determined by future, well-designed epidemiological studies that are able to analyze age-specific and non-linear effects and complement our approach.

### **Long-term effects of MPT**

Although numerous cross-sectional studies suggest a relationship between earlier onset of puberty and (clinical) endpoints (i.e., the development of alcohol dependency, cannabis abuse, major depression, or anxiety disorders), this was not shown by the MR analyses conducted in the present study. The clinical outcomes in the present study were assessed in adults considering acute or past diagnoses or symptoms, thereby serving as an estimate of the lifetime risk for these conditions. The ‘maturational disparity’ hypothesis postulates that early maturing children and

## Male puberty timing and psychological traits

adolescents are confronted with a mismatch between rapid physical changes and slowly evolving cognitive resources to cope with these changes [2, 4, 46] which is also supported on a neurophysiological level [47, 48]. However, whether this mismatch attenuates with increasing age, and thus, the long-term impact of early puberty on problematic behaviors still needs to be investigated. Recent longitudinal studies have shown that the effects of early puberty in males on antisocial behavior, depression, externalizing traits, and substance abuse decrease (and in some cases even reverse) with increasing age [25, 49]. Accordingly, the MR analyses conducted here also showed a relationship between an early onset of puberty and age at first sexual contact but not the total number of sexual partners in adulthood. Also, while there was a notable trend towards a younger age of onset of depressive disorders, this did not apply to the lifetime risk for the development of a major depressive disorder (MDD). Thus, these results indicate that mental health consequences associated with ‘maturational disparity’ are transient, possibly confined to adolescence and early adulthood. On a genetic level, a recent GWAS in 94,154 participants with depression found a significant, albeit not perfect, genetic correlation ( $r_g = -0.49$ ) between age at onset of depression and lifetime MDD risk [43]. Similarly, strong but not perfect correlations were found between internalizing traits in children and adolescents and the lifetime risk for depression and anxiety disorders ( $r_g = 0.71$  and  $0.76$ ; [32]). Thus, even though much of the genetic liability of psychiatric disorders is shared across the lifespan, their manifestation exhibits age-related specificity. Further GWAS focusing on specific age groups (e.g., in children, adolescents, and young adults) are needed to gain a deeper understanding of these complex relationships across the lifespan and could inform future MR studies.

The only lifetime trait affected by MPT was the ‘Depressed Affect’ subdomain of neuroticism, with early puberty timing in males leading to increased score for ‘Depressed Affect’. The ‘Depressed Affect’ subdomain is derived from four of twelve items of a neuroticism scale (for



## Male puberty timing and psychological traits

details, see Supplemental Methods 2) by clustering genetic correlations on a single-item level [50]. In contrast, the other subdomain of this scale, ‘Worry’, exhibited a non-significant effect estimate in the opposite direction in the present study. Consequently, our MR studies revealed a non-significant effect of MPT on the broad trait ‘Neuroticism’. Despite strong genetic correlations between ‘Depressed Affect’ and depressive symptoms as well as anxiety [50], no effect of MPT on these outcomes was seen here. Thus, further studies on the relevance of these subdomains of ‘Neuroticism’ are needed. However, it should be noted that the effect of MPT on ‘Depressed Affect’ was not consistently found in sensitivity analyses, potentially related to issues of pleiotropy.

### **Limitations**

Our study has several limitations. First, the exposure (MPT) was determined based on self-reported information on the timing of voice breakage and facial hair growth, which might be subject to recall bias. However, polygenic risk scores derived from the target SNPs for MPT significantly predicted longitudinal self-reported Tanner staging in 1,126 boys [14]. Second, GWAS for 16 of the 17 outcomes analyzed in the current study were based on sex-pooled effect estimates rather than sex-specific analyses, primarily because sex-specific GWAS were not available. However, current evidence suggests marginal sex differences in the autosomal genetic architecture of most traits, behaviors, and psychopathologies [51], justifying their use as outcomes in MR with a sex-specific exposure. Accordingly, this approach has been applied in various MR studies, including testosterone levels in men or age at menarche concerning MDD [11, 52]. Despite evidence of sex differences in the genetic liability for the trait ‘Antisocial Behavior’, we decided to use the sex-combined GWAS with 16,400 participants, as the male-stratified GWAS included only 7,772 participants and would therefore probably not have been

## Male puberty timing and psychological traits

sufficiently powered. Male-specific summary statistics with an adequate sample size (182,791) were only available for the outcome ‘Age at First Sex’. Third, the sample sizes of the outcome GWAS varied widely, leading to large differences in the power of the conducted MR studies. As most of the outcome GWAS were based on continuous outcomes and the power estimation of MR studies on continuous outcomes is dependent on further information, e.g. on the exposure-outcome association on the phenotypic level [53], which was not available to us, we decided against power calculations based on arbitrary assumptions. However, despite reasonable sample sizes in most of the studies used here, minor effects of MPT might have been missed. Fourth, two-sample MR studies as utilized here are based on linear models and therefore do not account for potential non-linear relationships.

### **Conclusions**

The MR analyses conducted here support a causal effect of MPT on the development of specific psychological traits and behaviors. Specifically, earlier MPT was associated with an earlier age at first sex, while later pubertal timing was associated with increased internalizing traits in children and adolescents. However, the effects of male puberty timing might be transient as no effects on adulthood extraversion or neuroticism or lifetime risk for psychiatric disorders were found. In line with this conclusion, there was a notable trend towards earlier age at the onset of depression with early maturation. However, this trend did not perpetuate to the lifetime risk of developing a major depressive disorder. To further explore the causal relationships between puberty timing and the onset of psychopathologies, particularly during the critical periods of late adolescence and early adulthood, additional age- and sex-specific GWAS followed by Mendelian randomization analyses are needed.

### **Ethics**

## Male puberty timing and psychological traits

All GWAS utilized in the current MR studies were conducted after approval of the respective local ethics committee and obtained written informed consent of the participants or their legal representatives.

### **Author contributions**

LD, TP, and RH conceptualized the study. LD conducted the statistical analyses. TP and RH supervised the statistical analyses. LD wrote the first draft of the manuscript. TP, CG, AH, and RH critically revised the manuscript.

### **Funding**

This work was supported by a fellowship from the University Medicine Essen Clinician Scientist Academy (UMEA) of the Medical Faculty of the University Duisburg-Essen (supported by the German Research Foundation (DFG)) to LD (FU 356/12-2).

### **Competing interests**

LD, TP, AH, and CG have nothing to disclose.

## Figure legends

**Figure 1.** Illustration of the analytic approach and outcome variables assessed. The phenotypes ‘Antisocial Behavior’ and ‘Early Life Aggression’ as well as the overarching phenotypes ‘Externalizing Traits’ and ‘Early Life Internalizing Traits’ (the latter two are not shown for clarity) were based on meta-analytic GWAS pooling underlying traits, disorders, and behaviors [32-35, 44]. The character trait phenotypes ‘Extraversion’, ‘Risk Tolerance’, and ‘Neuroticism’ were based on cross-sectional measures with personality inventories (or based on a single item in the case of ‘Risk Tolerance’) in adulthood [36-38]. ‘Depressed Affect’ and ‘Worry’ represent genetically identified subclusters of ‘Neuroticism’ and thus were based on a subset of items of the ‘Neuroticism’ scale [37, 50]. The phenotype ‘Ever Smoker’ was based on the self-description of ever initiating smoking (i.e., smoking once or twice did not count as an ‘Ever Smoker’) [38]. For the ‘Number of Sexual Partners’ GWAS’ participants were asked about the number of sexual partners they had in their lifetime [38]. The phenotypes ‘Alcohol Dependency’, ‘Cannabis Abuse’, ‘Depression’, and ‘Anxiety Disorders’ were clinically defined based on the lifetime diagnosis of the respective psychiatric disorder using relevant diagnostic systems such as the DSM-IV or ICD-10 [39-42, 54]. The phenotypes ‘Age at First Sex’ and ‘Age at Onset of Depression’ were based on the recollected age at first sexual intercourse/age at onset of depressive symptoms or diagnosis [31, 43]. BMI=body mass index; IVW=inverse-variance weighted; SNP=single-nucleotide polymorphism

**Figure 2.** Results of the univariable Mendelian randomization (MR) analyses on the effect of male puberty timing on externalizing and internalizing traits and disorders. As primary endpoints, the inverse-variance weighted (IVW) effect estimates are illustrated after MR-PRESSO correction for pleiotropic outliers. \* For reasons of comparability, ‘Age at First Sex’ and ‘Age at

Onset of Depression' inversely coded in the current MR analyses. Thus, negative effect estimates indicate a higher risk of developing psychopathology (for clinical endpoints), increased expression of a specific trait or behaviors, or a younger age at first sexual intercourse/depression onset with earlier male puberty timing. The outcome variables 'Early Life Aggression' and 'Early Life Internalizing Traits' are exclusively based on data from children and adolescents, whereas the other outcomes mainly involve adult cohorts (see Method Section and Supplemental Table S1 for a detailed description of cohorts and phenotypes). Results of the sensitivity analyses for FDR-corrected outcomes with a p-value < 0.05 are illustrated in Figure 3, while those for all other outcomes are given in Supplementary Figures S21-S33.

**Figure 3.** Results of the MR analyses of the effect of male puberty timing on the outcomes 'Externalizing Traits' (Fig. 3A), 'Age at First Sex' (Fig. 3B), 'Early Life Internalizing Traits' (Fig. 3C), and the 'Depressed Affect' subdomain of neuroticism (Fig 3D). 'IVW' represents the inverse-variance weighted (IVW) effect estimate after adjusting for pleiotropic outliers identified by MR-PRESSO. The 'MR-PRESSO raw' estimate represents the IVW estimate without excluding pleiotropic outliers. For the outcome 'Early Life Internalizing Traits' no pleiotropic outlier was detected, and thus, in this instance, the 'MR-PRESSO raw' effect estimate corresponds to the IVW estimate and therefore is not shown. The 'IVW BMIcorr' estimate represents the IVW effect estimate (after exclusion of pleiotropic outliers by MR-PRESSO) of male puberty timing on the specified outcome in an MVMR analysis considering BMI as an additional exposure. The 'IVW VB' effect estimate is the IVW effect estimate (after exclusion of pleiotropic outliers by MR-PRESSO) for the exposure 'Age at Voice Break' on the respective outcome. This exposure is exclusively based on 23andMe participants to ensure no exposure-outcome sample overlap, as none of the outcome GWAS datasets included 23andMe data. *a*: Eggers-intercept did not show evidence for significant directional pleiotropy (intercept=0.0018,

se=0.0010, p=0.072). The  $I^2$ -statistic was 0.762, indicating a possible violation of the NOME assumption. Therefore, the MR Egger result should be interpreted with caution. *b*: Eggers-intercept did not show evidence for significant directional pleiotropy (intercept=0.0002, se=0.0017, p=0.905). The  $I^2$ -statistic was 0.777, again indicating a possible violation of the NOME assumption. *c*: Eggers-intercept did not show evidence for significant directional pleiotropy (intercept=-0.0002, se=0.0014, p=0.089). The  $I^2$ -statistic was 0.785, indicating a possible violation of the NOME assumption. *d*: Eggers-intercept did not show evidence for significant directional pleiotropy (intercept=-0.0013, se=0.0012, p=0.314). The  $I^2$ -statistic was 0.780, indicating a possible violation of the NOME assumption for the conduction of MR Egger.

## References

1. Whiteford HA, Degenhardt L, Rehm J, Baxter AJ, Ferrari AJ, Erskine HE, et al. (2013) Global burden of disease attributable to mental and substance use disorders: findings from the Global Burden of Disease Study 2010. *The lancet* 382:1575-1586
2. Ullsperger JM, Nikolas MA (2017) A meta-analytic review of the association between pubertal timing and psychopathology in adolescence: Are there sex differences in risk? *Psychological bulletin* 143:903
3. Vijayakumar N, Youssef G, Bereznicki H, Dehestani N, Silk TJ, Whittle S (2023) The social determinants of emotional and behavioral problems in adolescents experiencing early puberty. *Journal of Adolescent Health*
4. Benoit A, Lacourse E, Claes M (2013) Pubertal timing and depressive symptoms in late adolescence: The moderating role of individual, peer, and parental factors. *Development and Psychopathology* 25:455-471
5. Niu L, Sheffield P, Li Y (2023) Pubertal timing, neighborhood income, and mental health in boys and girls: Findings from the adolescent brain cognitive development study. *Social Science & Medicine* 334:116220
6. Hamlat EJ, Stange JP, Abramson LY, Alloy LB (2014) Early pubertal timing as a vulnerability to depression symptoms: Differential effects of race and sex. *Journal of Abnormal Child Psychology* 42:527-538

7. Li C, Zhao Q, Zhang L, Zhang Y (2023) Tell me what you think about: Does parental solicitation weaken the links between pubertal timing and depressive symptoms? *Current Psychology* 42:4326-4335
8. Ye Z, Rudolph KD (2023) Talk it out or tuck it away: The contribution of maternal socialization of coping to depression in youth with early pubertal maturation. *Developmental psychology*
9. Lawlor DA, Harbord RM, Sterne JA, Timpson N, Davey Smith G (2008) Mendelian randomization: using genes as instruments for making causal inferences in epidemiology. *Statistics in medicine* 27:1133-1163
10. Ebrahim S, Davey Smith G (2008) Mendelian randomization: can genetic epidemiology help redress the failures of observational epidemiology? *Human genetics* 123:15-33
11. Hirtz R, Hars C, Naaresh R, Laabs B-H, Antel J, Grasmann C, et al. (2022) Causal Effect of Age at Menarche on the Risk for Depression: Results From a Two-Sample Multivariable Mendelian Randomization Study. *Frontiers in Genetics* 13
12. Pan C, Li Ce, Cheng S, Chen Y, Zhang J, Zhang Z, et al. (2023) The Effect of Secondary Sexual Characteristics Outset Time Abnormality on Addiction in Adults: a Mendelian Randomization Study. *International Journal of Mental Health and Addiction*:1-18
13. Burgess S, Davies NM, Thompson SG (2016) Bias due to participant overlap in two-sample Mendelian randomization. *Genetic epidemiology* 40:597-608
14. Hollis B, Day FR, Busch AS, Thompson DJ, Soares ALG, Timmers PR, et al. (2020) Genomic analysis of male puberty timing highlights shared genetic basis with hair colour and lifespan. *Nature communications* 11:1536
15. Hirtz R, Grasmann C, Hölling H, von Holt B-H, Albers N, Hinney A, et al. (2023) No relationship between male pubertal timing and depression—new insights from epidemiology and Mendelian randomization. *Psychological Medicine*:1-10
16. Woolf B, Mason A, Zagkos L, Sallis H, Munafò MR, Gill D (2024) MRSamePopTest: introducing a simple falsification test for the two-sample mendelian randomisation ‘same population’ assumption. *BMC Research Notes* 17:27
17. Haycock PC, Burgess S, Wade KH, Bowden J, Relton C, Davey Smith G (2016) Best (but oft-forgotten) practices: the design, analysis, and interpretation of Mendelian randomization studies. *The American journal of clinical nutrition* 103:965-978
18. Burgess S, Bowden J, Fall T, Ingelsson E, Thompson SG (2017) Sensitivity analyses for robust causal inference from Mendelian randomization analyses with multiple genetic variants. *Epidemiology (Cambridge, Mass.)* 28:30
19. Burgess S, Thompson SG (2015) Multivariable Mendelian randomization: the use of pleiotropic genetic variants to estimate causal effects. *American journal of epidemiology* 181:251-260

20. Verbanck M, Chen C-Y, Neale B, Do R (2018) Detection of widespread horizontal pleiotropy in causal relationships inferred from Mendelian randomization between complex traits and diseases. *Nature genetics* 50:693-698
21. Bowden J, Davey Smith G, Haycock PC, Burgess S (2016) Consistent estimation in Mendelian randomization with some invalid instruments using a weighted median estimator. *Genetic epidemiology* 40:304-314
22. Hartwig FP, Davey Smith G, Bowden J (2017) Robust inference in summary data Mendelian randomization via the zero modal pleiotropy assumption. *International journal of epidemiology* 46:1985-1998
23. Bowden J, Davey Smith G, Burgess S (2015) Mendelian randomization with invalid instruments: effect estimation and bias detection through Egger regression. *International journal of epidemiology* 44:512-525
24. Zhao Q, Wang J, Hemani G, Bowden J, Small DS (2020) Statistical inference in two-sample summary-data Mendelian randomization using robust adjusted profile score.
25. Hoyt LT, Niu L, Pachucki MC, Chaku N (2020) Timing of puberty in boys and girls: Implications for population health. *SSM-population health* 10:100549
26. Reinehr T, Roth CL (2019) Is there a causal relationship between obesity and puberty? *The Lancet Child & Adolescent Health* 3:44-54
27. Drosopoulou G, Sergentanis TN, Mastorakos G, Vlachopapadopoulou E, Michalacos S, Tzavara C, et al. (2021) Psychosocial health of adolescents in relation to underweight, overweight/obese status: The EU NET ADB survey. *European Journal of Public Health* 31:379-384
28. Pulit SL, Stoneman C, Morris AP, Wood AR, Glastonbury CA, Tyrrell J, et al. (2019) Meta-analysis of genome-wide association studies for body fat distribution in 694 649 individuals of European ancestry. *Human molecular genetics* 28:166-174
29. Benjamini Y, Hochberg Y (1995) Controlling the false discovery rate: a practical and powerful approach to multiple testing. *Journal of the Royal statistical society: series B (Methodological)* 57:289-300
30. Haycock PC, Borges MC, Burrows K, Lemaitre RN, Harrison S, Burgess S, et al. (2023) Design and quality control of large-scale two-sample Mendelian randomization studies. *International journal of epidemiology* 52:1498-1521
31. Mills MC, Tropf FC, Brazel DM, van Zuydam N, Vaez A, Team BCM (2021) Identification of 371 genetic variants for age at first sex and birth linked to externalising behaviour. *Nature human behaviour* 5:1717-1730
32. Jami ES, Hammerschlag AR, Ip HF, Allegrini AG, Benyamin B, Border R, et al. (2022) Genome-wide association meta-analysis of childhood and adolescent internalizing



- symptoms. *Journal of the American Academy of Child & Adolescent Psychiatry* 61:934-945
33. Ip HF, Van der Laan CM, Krapohl EM, Brikell I, Sánchez-Mora C, Nolte IM, et al. (2021) Genetic association study of childhood aggression across raters, instruments, and age. *Translational psychiatry* 11:413
  34. Williams CM, Poore H, Tanksley PT, Kweon H, Courchesne-Krak NS, Londono-Correa D, et al. (2023) Guidelines for evaluating the comparability of down-sampled GWAS summary statistics. *Behavior Genetics* 53:404-415
  35. Karlsson Linnér R, Mallard TT, Barr PB, Sanchez-Roige S, Madole JW, Driver MN, et al. (2021) Multivariate analysis of 1.5 million people identifies genetic associations with traits related to self-regulation and addiction. *Nature neuroscience* 24:1367-1376
  36. Van den Berg SM, de Moor MH, Verweij KJ, Krueger RF, Luciano M, Arias Vasquez A, et al. (2016) Meta-analysis of genome-wide association studies for extraversion: findings from the genetics of personality consortium. *Behavior genetics* 46:170-182
  37. Nagel M, Jansen PR, Stringer S, Watanabe K, De Leeuw CA, Bryois J, et al. (2018) Meta-analysis of genome-wide association studies for neuroticism in 449,484 individuals identifies novel genetic loci and pathways. *Nature genetics* 50:920-927
  38. Karlsson Linnér R, Biroli P, Kong E, Meddens SFW, Wedow R, Fontana MA, et al. (2019) Genome-wide association analyses of risk tolerance and risky behaviors in over 1 million individuals identify hundreds of loci and shared genetic influences. *Nature genetics* 51:245-257
  39. Wray NR, Ripke S, Mattheisen M, Trzaskowski M, Byrne EM, Abdellaoui A, et al. (2018) Genome-wide association analyses identify 44 risk variants and refine the genetic architecture of major depression. *Nature genetics* 50:668-681
  40. Otowa T, Hek K, Lee M, Byrne EM, Mirza SS, Nivard MG, et al. (2016) Meta-analysis of genome-wide association studies of anxiety disorders. *Molecular psychiatry* 21:1391-1399
  41. Johnson EC, Demontis D, Thorgeirsson TE, Walters RK, Polimanti R, Hatoum AS, et al. (2020) A large-scale genome-wide association study meta-analysis of cannabis use disorder. *The Lancet Psychiatry* 7:1032-1045
  42. Walters RK, Polimanti R, Johnson EC, McClintick JN, Adams MJ, Adkins AE, et al. (2018) Transancestral GWAS of alcohol dependence reveals common genetic underpinnings with psychiatric disorders. *Nature neuroscience* 21:1656-1669
  43. Harder A, Nguyen T-D, Pasma JA, Mosing MA, Hägg S, Lu Y (2022) Genetics of age-at-onset in major depression. *Translational Psychiatry* 12:124

44. Tielbeek JJ, Johansson A, Polderman TJ, Rautiainen M-R, Jansen P, Taylor M, et al. (2017) Genome-wide association studies of a broad spectrum of antisocial behavior. *JAMA psychiatry* 74:1242-1250
45. Sontag LM, Graber JA, Clemans KH (2011) The role of peer stress and pubertal timing on symptoms of psychopathology during early adolescence. *Journal of youth and adolescence* 40:1371-1382
46. Petersen AC, Crockett L (1985) Pubertal timing and grade effects on adjustment. *Journal of Youth and Adolescence* 14:191-206
47. Vijayakumar N, Whittle S, Silk TJ (2023) Corticolimbic connectivity mediates the relationship between pubertal timing and mental health problems. *Psychological Medicine* 53:7655-7665
48. Dehestani N, Whittle S, Vijayakumar N, Silk TJ (2023) Developmental brain changes during puberty and associations with mental health problems. *Developmental Cognitive Neuroscience* 60:101227
49. Dimler LM, Natsuaki MN (2021) Trajectories of violent and nonviolent behaviors from adolescence to early adulthood: does early puberty matter, and, if so, how long? *Journal of Adolescent Health* 68:523-531
50. Nagel M, Watanabe K, Stringer S, Posthuma D, Van Der Sluis S (2018) Item-level analyses reveal genetic heterogeneity in neuroticism. *Nature communications* 9:905
51. Martin J, Khramtsova EA, Goleva SB, Blokland GA, Traglia M, Walters RK, et al. (2021) Examining sex-differentiated genetic effects across neuropsychiatric and behavioral traits. *Biological psychiatry* 89:1127-1137
52. Mohammadi-Shemirani P, Chong M, Pigeys M, Morton RW, Gerstein HC, Paré G (2020) Effects of lifelong testosterone exposure on health and disease using Mendelian randomization. *Elife* 9:e58914
53. Brion M-JA, Shakhbazov K, Visscher PM (2013) Calculating statistical power in Mendelian randomization studies. *International journal of epidemiology* 42:1497-1501
54. Howard DM, Adams MJ, Clarke T-K, Hafferty JD, Gibson J, Shiri M, et al. (2019) Genome-wide meta-analysis of depression identifies 102 independent variants and highlights the importance of the prefrontal brain regions. *Nature neuroscience* 22:343-352

**Table 1.** Overview of the exposure and outcome GWAS included in the MR analyses in the present study.

| Male Puberty Timing |                   |                       | Outcome GWAS         |                                                        |                                 |                                  |                                                          |                                           |                                 |
|---------------------|-------------------|-----------------------|----------------------|--------------------------------------------------------|---------------------------------|----------------------------------|----------------------------------------------------------|-------------------------------------------|---------------------------------|
| Study               | Sample Size       | Samples               | Study                | Trait                                                  | Age Group                       | Cohort                           | Sample Size                                              |                                           |                                 |
| Hollis et al., 2020 | 205,354           | UK Biobank<br>23andMe | Externalizing Traits | Karlsson Linnér et al., 2021 and Williams et al., 2023 | Externalizing traits            | Primarily Adults                 | UK Biobank and 63 additional cohorts<br>GPC (29 cohorts) | 1,045,957                                 |                                 |
|                     |                   |                       |                      | Van den Berg et al., 2016                              | Extraversion                    | Primarily Adults                 | GPC (29 cohorts)                                         | 63,030                                    |                                 |
|                     |                   |                       |                      | Tielbeek et al., 2017                                  | Antisocial Behavior             | Children, Adolescents and Adults | Broad Antisocial Behavior Consortium (8 cohorts)         | 16,400                                    |                                 |
|                     |                   |                       |                      | Ip et al., 2021                                        | Early Life Aggression           | Children and Adolescents         | ACTION and EAGLE consortium (29 cohorts)                 | 87,485                                    |                                 |
|                     |                   |                       |                      | Karlsson Linnér et al., 2019                           | General Risk Tolerance          | Adults                           | UK Biobank and 10 additional cohorts                     | 466,571                                   |                                 |
|                     |                   |                       |                      | Karlsson Linnér et al., 2019                           | Ever Smoker                     | Adults                           | UK Biobank<br>TAG consortium (16 cohorts)                | 518,633                                   |                                 |
|                     |                   |                       |                      | Karlsson Linnér et al., 2019                           | Number of Sexual Partners       | Adults                           | UK Biobank                                               | 370,711                                   |                                 |
|                     |                   |                       |                      | Mills at al., 2021                                     | Age at first sexual intercourse | Adults                           | UK Biobank                                               | 182,791                                   |                                 |
|                     |                   |                       |                      | Walters et al., 2018                                   | Alcohol Dependency              | Adolsecents and Adults           | PGC (28 cohorts)                                         | 11,569 cases<br>34,999 controls           |                                 |
|                     |                   |                       |                      | Johnson et al., 2020                                   | Cannabis Abuse                  | Adolescents and Adults           | PGC (20 cohorts)                                         | 17,068 cases<br>357,219 controls          |                                 |
|                     |                   |                       |                      | Jami et al., 2022                                      | Early Life Internalizing Traits | Children and Adolescents         | EAGLE consortium (22 cohorts)<br>UK Biobank              | 64,561                                    |                                 |
|                     |                   |                       |                      | Nagel et al., 2018                                     | Neuroticism                     | Primarily Adults                 | GPC (10 cohorts)                                         | 390,278                                   |                                 |
|                     |                   |                       |                      | Nagel et al., 2018                                     | Depressed Affect                | Adults                           | UK Biobank                                               | 357,957                                   |                                 |
|                     |                   |                       |                      | Nagel et al., 2018                                     | Worry                           | Adults                           | UK Biobank                                               | 348,219                                   |                                 |
|                     |                   |                       |                      | Internalizing Traits                                   | Wray et al., 2018               | Depression                       | Adults                                                   | PGC (29 cohorts) and 4 additional cohorts | 45,396 cases<br>97,250 controls |
|                     |                   |                       |                      | Harder et al., 2022                                    | Age at Onset of Depression      | Adults                           | UK Biobank                                               | 94,154                                    |                                 |
| Otowa et al., 2016  | Anxiety Disorders | Adults                | PGC (8 cohorts)      | 18,186                                                 |                                 |                                  |                                                          |                                           |                                 |

This table gives an overview of the exposure and outcome GWAS included in the MR analyses in the present study. ‘Primarily adult’ indicates that the majority of the sample consisted of adults (see Supplemental Table S01 for details); ACTION consortium=Aggression in Children: unraveling gene-environment interplay to inform Treatment and InterventiON strategies consortium; EAGLE consortium=Early Genetics and Lifecourse Epidemiology consortium; GPC=Genetics of Personality Consortium, PGC=Psychiatric Genomics Consortium; TAG consortium=Tobacco, Alcohol and Genetics consortium.

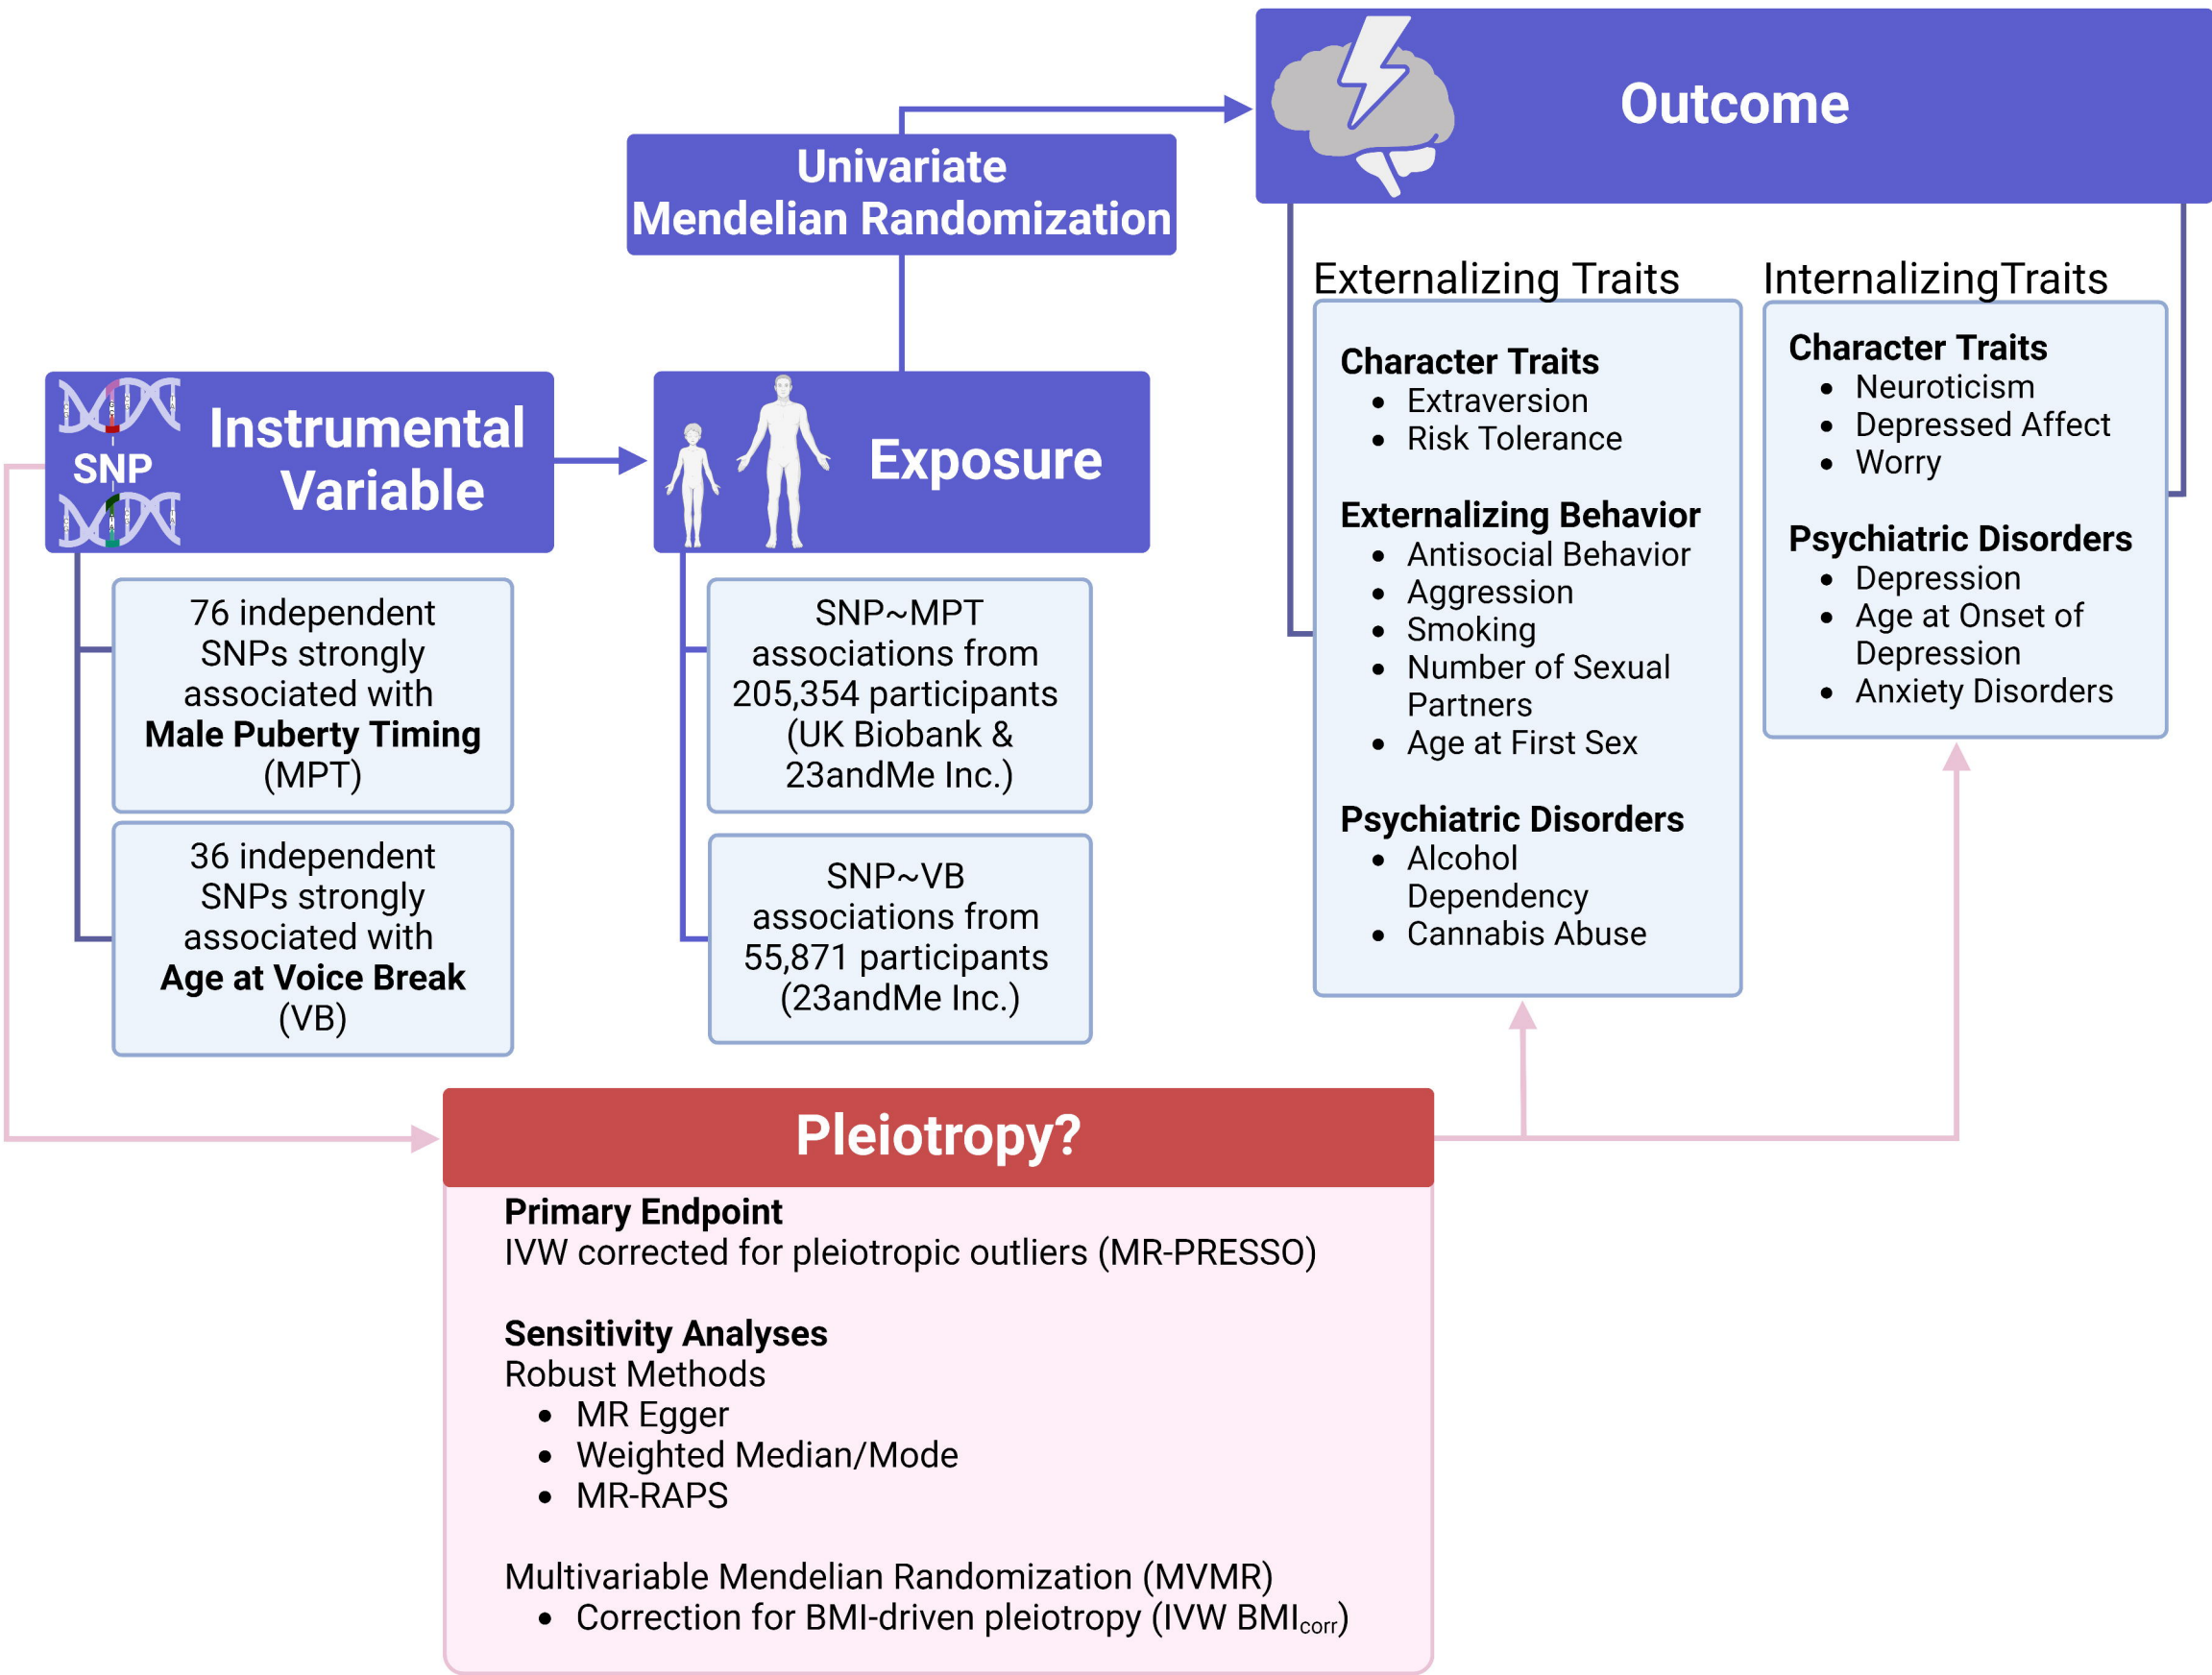

| Outcome                         | beta (95% CI)          | p value<br>(FDR corrected) |
|---------------------------------|------------------------|----------------------------|
| <b>Externalizing</b>            |                        |                            |
| Alcohol Dependency              | 0.01 (-0.08 to 0.10)   | 0.916                      |
| Risk Tolerance                  | 0.01 (-0.02 to 0.03)   | 0.865                      |
| Extraversion                    | -0.01 (-0.06 to 0.04)  | 0.865                      |
| Number Of Sexual Partners       | -0.01 (-0.05 to 0.02)  | 0.561                      |
| Ever Smoker                     | -0.02 (-0.05 to 0.01)  | 0.508                      |
| Early Life Aggression           | -0.02 (-0.04 to 0.01)  | 0.360                      |
| Cannabis Abuse                  | -0.02 (-0.05 to 0.00)  | 0.297                      |
| Antisocial Behavior             | -0.03 (-0.14 to 0.08)  | 0.806                      |
| Externalizing Traits            | -0.03 (-0.06 to -0.01) | 0.026                      |
| Age at First Sex *              | -0.17 (-0.21 to -0.13) | <0.001                     |
| <b>Internalizing</b>            |                        |                            |
| Early Life Internalizing Traits | 0.04 (0.01 to 0.08)    | 0.026                      |
| Worry                           | 0.02 (-0.01 to 0.05)   | 0.561                      |
| Neuroticism                     | 0.00 (-0.03 to 0.03)   | 0.916                      |
| Anxiety Disorders               | -0.01 (-0.06 to 0.04)  | 0.865                      |
| Depressed Affect                | -0.04 (-0.07 to -0.01) | 0.039                      |
| Depression                      | -0.05 (-0.15 to 0.05)  | 0.561                      |
| Age at Onset of Depression *    | -0.05 (-0.10 to 0.00)  | 0.115                      |

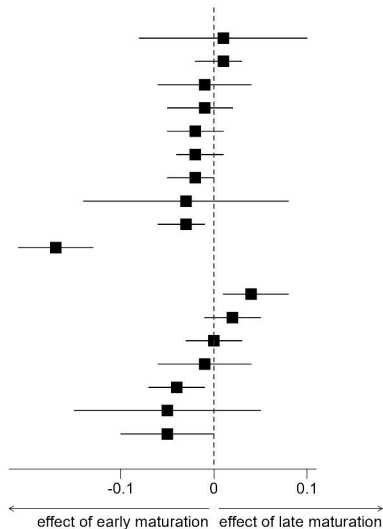

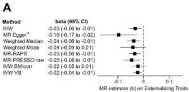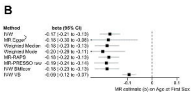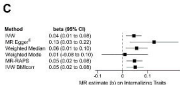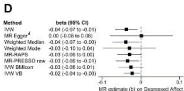

Source: https://www.medrxiv.org/content/10.1101/2024.05.30.24308257v1.full.pdf
